# Supplementary material
Source: Springer Nature journal article supplement (https://www.springermedizin.de/resource/supplementary/13063_2008_263_MOESM3_ESM.pdf/9622416)

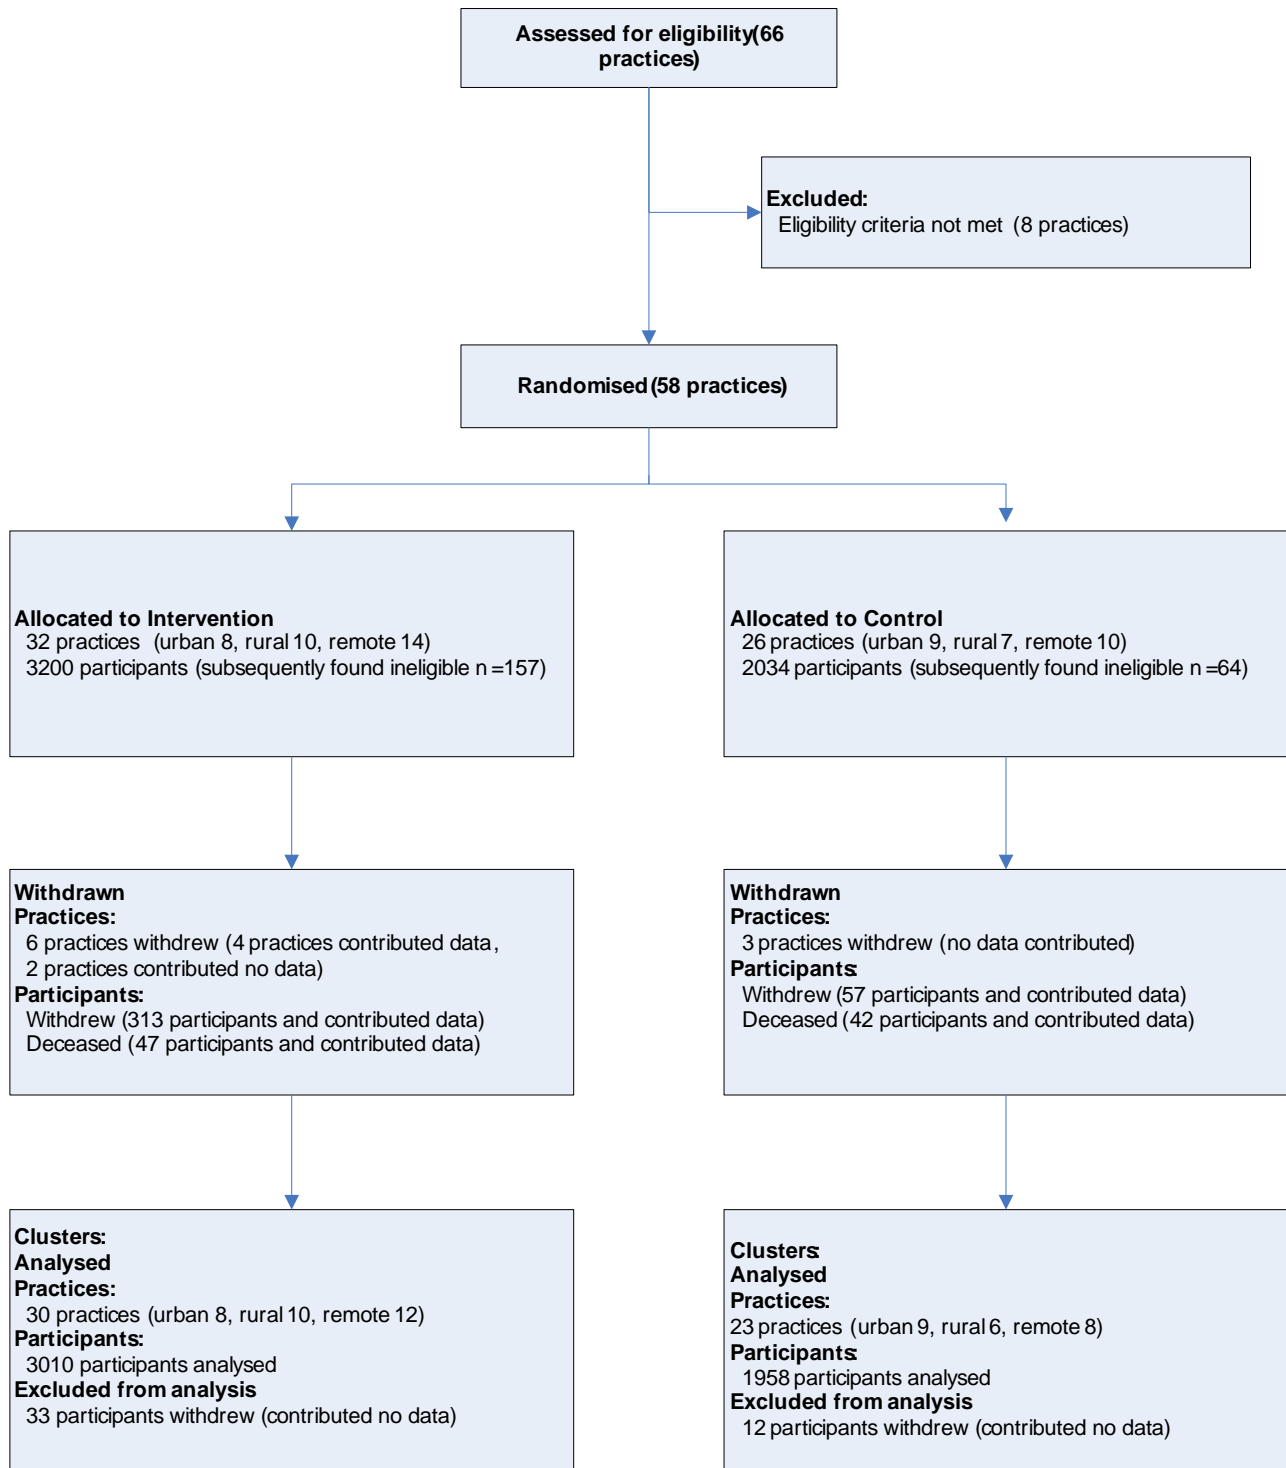

Supplement: MOESM3 [file 9622416]
